# Supplementary material
Source: publisher site journal article supplement (https://www.spandidos-publications.com/3100/downloadSupplementary)
Supplement: Supplementary file 1 [file downloadSupplementary]

## Sheet: Sheet1
Table SI. The full list of the common DEGs between OA and normal cartilage from the datasets GSE113825 and GSE114007.
Upregulated	Downregulated
KIF23	MYOC
PANK1	PAK3
GLB1	APOD
PLBD1	CYTL1
PTTG1	MLLT4-AS1
GDE1	STC2
DTL	SLC38A3
RAMP3	RORC
REEP4	ERICH1
ABHD6	TPRG1
CA12	GPX3
CCNE1	ADAMTSL2
NIP7	SH3RF2
TRAPPC1	BEX2
RAB27B	DIRAS3
PDE3A	INADL
AURKA	TSPYL2
NCAPG	GPM6A
GEN1	MOGAT1
TFDP1	SAMD12
OSTC	ILF3-AS1
GPR153	DPY19L2
YPEL4	PARM1
EHD3	PPP4R4
TUBA1B	TMOD1
GPR161	GBP2
BMP1	FOXD2-AS1
GM2A	ADSSL1
CYB5A	CCNB1IP1
SUCNR1	BCL6
PCNA	NDNF
MARCO	PTPN22
PLK1	SCNN1A
TREM2	TBX4
ACOX2	NR1D1
SLC44A5	AOX1
LTBP1	TIPARP
CENPF	PAIP2B
MYEF2	ZKSCAN1
CCNA2	ASS1
GNG2	PALD1
ITPA	SLAIN1
CENPN	OXNAD1
CD300C	CITED2
HJURP	SREBF1
EDA2R	LAYN
ADAMTS7	PPP1R3E
CCND1	EPS8
LRRC8C	ZHX2
ANO1	PHF3
ANTXR1	CXXC4
NCEH1	TIPARP-AS1
ASPM	CTH
GALNT1	WDR5B
ANGPTL1	GPRC5C
CD28	ALDH1L1
KPNA2	SGSM1
TMEM189
CMTM3
EPDR1
TMEM8A
SERPINA5
HSPA8
FADS2
S100A3
EXTL2
UBE2C
SH3KBP1
ARHGAP11A
CAPZB
GPC4
PLAU
PRR11
TYROBP
SGCD
LSAMP
ARNTL2
ARPC5
SLC16A6
NUSAP1
CDK6
SPC25
FAM111B
CDK1
CENPW
LEPROTL1
RAC2
CALD1
KIF20A
ADAMTS16
NCF4
PIK3AP1
KCNN4
GAS2L3
NRP1
FBLN5
LRRC17
EVI2A
BTBD11
CSRNP3
TBXAS1
TBC1D9
GNG11
C1QC
IGFBP4
C1R
TSPAN15
PLEKHG1
ADCY7
LHFPL2
TOP2A
NAV3
PPIC
RCC2
SPOCK1
ARHGDIB
ECM1
MAP1A
PLEKHS1
CDKN3
ARHGAP28
BMPR1B
SGK1
EZH2
CTSK
UCHL1
TWIST1
TNFRSF9
CSF1R
GABRB2
CAMK2N1
GPR124
GPR176
LILRB2
TLL1
SPARC
ARL4C
SNX10
ADAMTS2
CELF2
C1QA
ROR1
TSPAN11
TRPV2
LIPA
PTPRC
NCAM2
TTC9
PTN
PCOLCE
PRSS23
PLCB2
VSIG4
OSBPL3
RAB23
AOC2
GMFG
CDH2
CHN1
HECW2
CLEC3B
COL6A1
NRP2
FAP
CYBB
ANLN
SEMA5A
VEGFC
ARHGAP18
TPPP3
C2
ABCC3
DPT
MPEG1
PARP15
NID2
ITGAM
RAB31
VGLL3
RUNX1-IT1
MXRA5
MEST
MMP2
IFI30
ALOX5AP
TMEM176B
CCR1
MMP19
COL5A1
ALPL
MME
S100A4
PLTP
SULF1
TMSB4X
C1QB
FLRT2
KHDRBS3
CD163
DOCK10
CRABP2
HLA-DRB1
HLA-DRA
LILRB5
COL6A3
TNC
SEMA3C
MS4A6A
PLXDC1
RNASE1
THY1
OLFML2B
SRPX
SLCO2B1
PCDH18
SFRP4
AQP1
SLITRK6
FNDC1
MAP1B
ANPEP
LEF1
HLA-DMB
MMP9
STAB1
TNFAIP6
MSR1
FPR3
THBS2
COL1A2
LRRC15
POSTN
COL1A1
SERPINF1
MMP13
